# Supplementary material for: Inhibiting ERK dimerization ameliorates BRAF-driven anaplastic thyroid cancer
Source: PubMed Central journal article supplement (PMC9440884; doi:10.1007/s00018-022-04530-9), 2022-09-03
Supplement: 18_2022_4530_MOESM1_ESM.pdf [file 18_2022_4530_MOESM1_ESM.pdf]

**Additional file 1. Table S1**

| <b>GENE_ORIENTATION</b> | <b>SEQUENCE</b>                 |
|-------------------------|---------------------------------|
| FOS_Fwd                 | 5'-TGTGAAGACCATGACAGGAGG-3'     |
| FOS_Rv                  | 5'-TTGGTCTGTCTCCGCTTGG-3'       |
| JUN_Fwd                 | 5'-GCGGACCTTATGGCTACAGT-3'      |
| JUN_Rv                  | 5'- CCCGTTGCTGGACTGGATTA-3'     |
| EGR1_Fwd                | 5'-TGACCGCAGAGTCTTTTCCTG-3'     |
| EGR1_Rv                 | 5'-GGTCATGCTCACTAGGCCAC-3'      |
| SNAI1_Fwd               | 5'- GCCTAGCGAGTGGTTCTTCT-3'     |
| SNAI1_Rv                | 5'-GCCAGGACAGAGTCCCAGAT-3'      |
| SNAI2_Fwd               | 5'- TTCCAGACCCTGGTTGCTTC-3'     |
| SNAI2_Rv                | 5'-ATTGCGTCACTCAGTGTGCT-3'      |
| ZEB1_Fwd                | 5'-CAGAGGATGACCTGCCAACA-3'      |
| ZEB1_Rv                 | 5'-CTCGCATTTCATCATCTTTTACTGT-3' |
| FN1_Fwd                 | 5'-TGCAAGCCCATAGCTGAGAA-3'      |
| FN1_Rv                  | 5'-AGATGCACTGGAGCAGGTTT-3'      |
| VIM_Fwd                 | 5'-AAGGCGAGGAGAGCAGGATTT-3'     |
| VIM_Rv                  | 5'-CGTGATGCTGAGAAGTTTCGT -3'    |
| CDH2_Fwd                | 5'-TGTGGACAGGATTGTGGGTG-3'      |
| CDH2_Rv                 | 5'-GGCTCAAGTCATAGTCCTGGT-3'     |
| CTNNB1_Fwd              | 5'-GCCATTTTAAGCCTCTCGGTC-3'     |
| CTNNB1_Rv               | 5'-CATCAAATCAGCTTGAGTAGCC-3'    |
| TBP_Fwd                 | 5'-GCAAGGGTTTCTGGTTTGCC-3'      |
| TBP_Rv                  | 5'-GGGTCAGTCCAGTGCCATAA-3'      |
| SLC5A5_Fwd              | 5'-CTCATCCTGAACCAAGTGAC-3'      |
| SLC5A5_Rv               | 5'-GAACACATCAGTCCAGACCA-3'      |
