# Supplementary material for: Inhibiting ERK dimerization ameliorates BRAF-driven anaplastic thyroid cancer
Source: PubMed Central journal article supplement (PMC9440884; doi:10.1007/s00018-022-04530-9), 2022-09-03

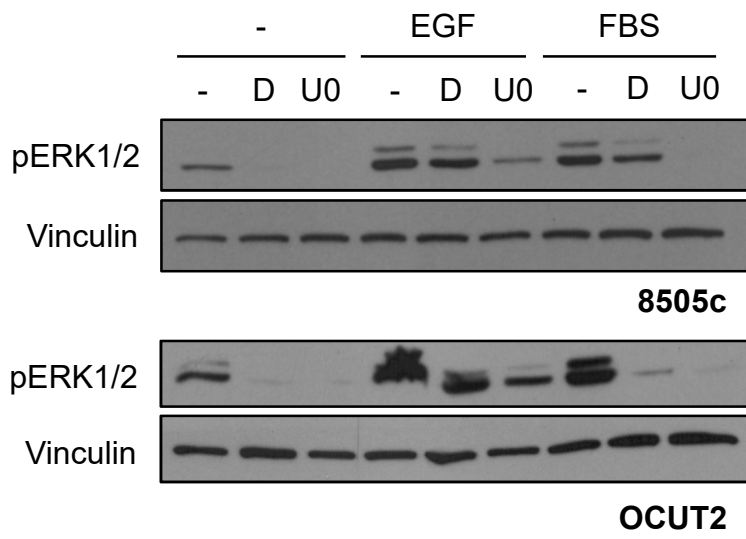

Supplement: 18_2022_4530_MOESM4_ESM.pdf [file 18_2022_4530_MOESM4_ESM.pdf]
