# Supplementary material for: Inhibiting ERK dimerization ameliorates BRAF-driven anaplastic thyroid cancer
Source: PubMed Central journal article supplement (PMC9440884; doi:10.1007/s00018-022-04530-9), 2022-09-03
Supplement: 18_2022_4530_MOESM5_ESM.pdf [file 18_2022_4530_MOESM5_ESM.pdf]

**A**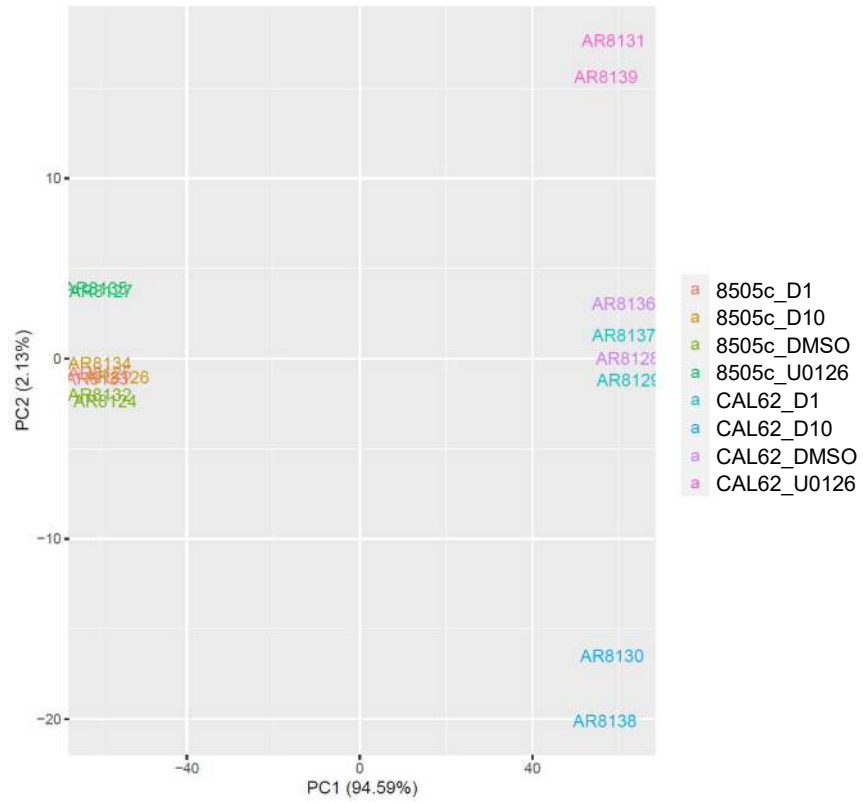**B**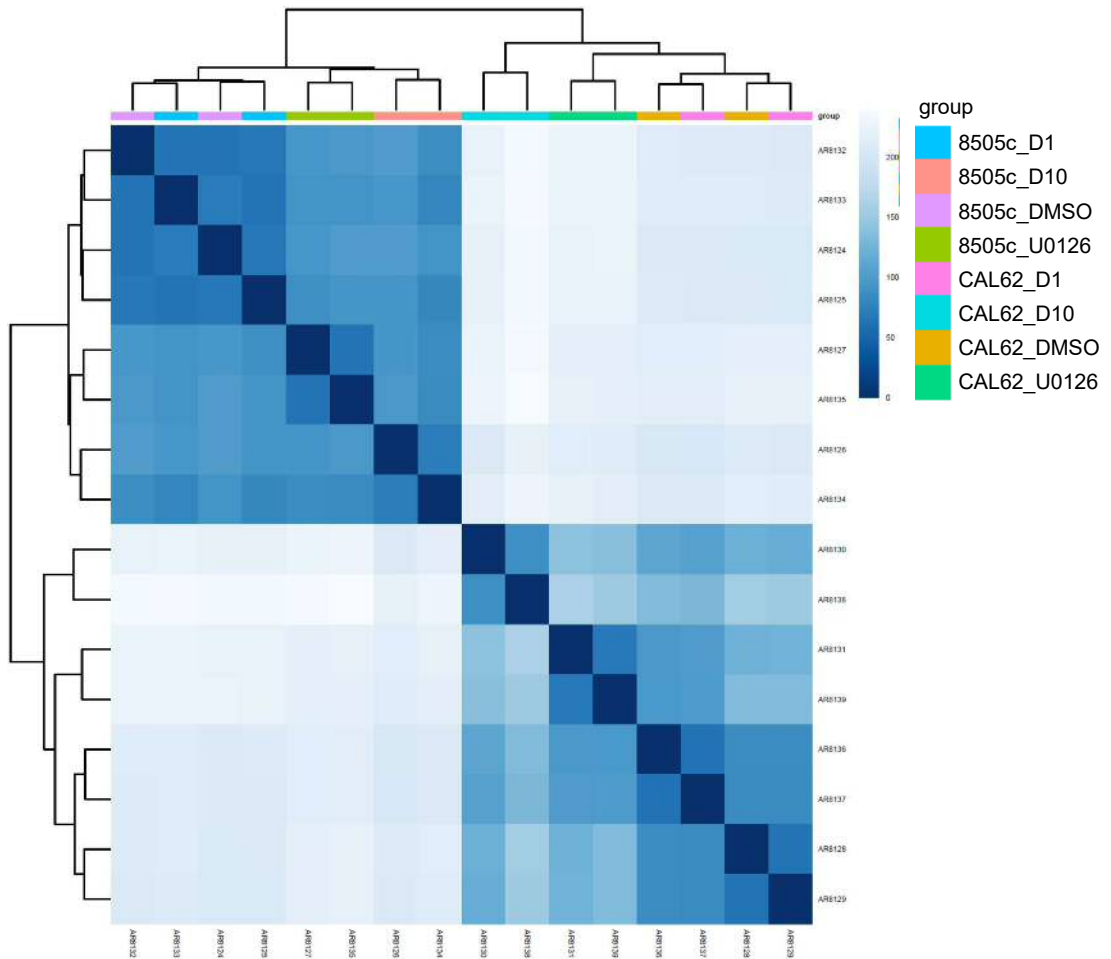

**C**

|       |           |           |
|-------|-----------|-----------|
|       | 8505c     | CAL62     |
| D1    | (5/3)     | (0/1)     |
| D10   | (152/357) | (604/886) |
| U0126 | (243/421) | (636/581) |

Under/Overexpressed genes

**D**

Underexpressed genes

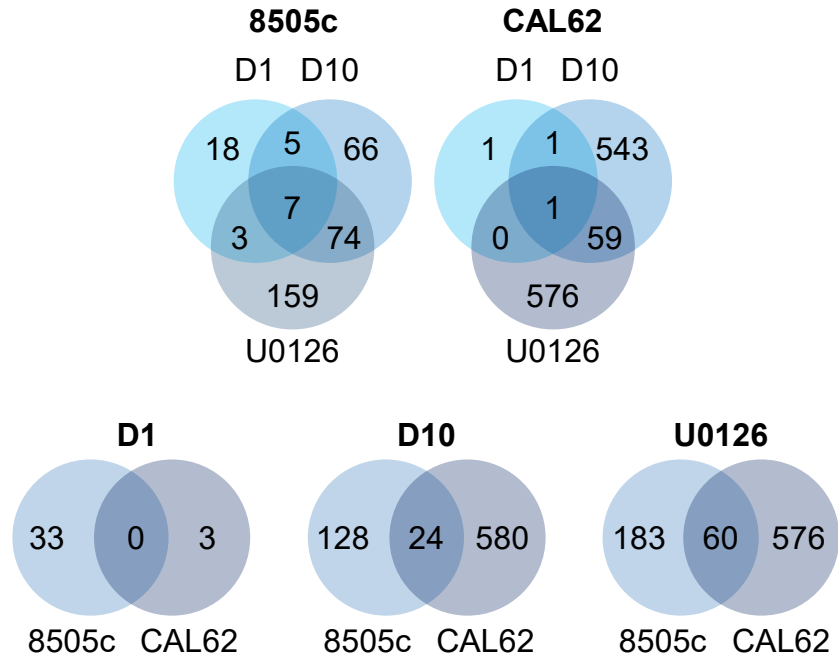

**E**

Overexpressed genes

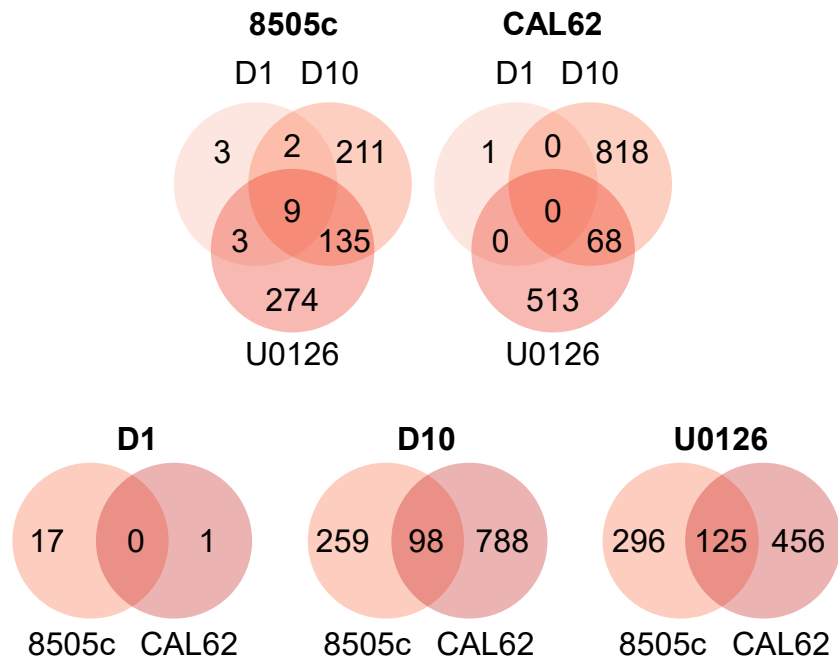

## F

### 8505c\_DEL-22379 1 $\mu$ M. Gene enrichment analysis. Underexpressed genes

| GO:BP                                         |            | stats                  |                       |      |    |     |  |
|-----------------------------------------------|------------|------------------------|-----------------------|------|----|-----|--|
| Term name                                     | Term ID    | P <sub>adj</sub> ↑     | $-\log_{10}(P_{adj})$ | T    | Q  | TnQ |  |
| response to cytokine                          | GO:0034097 | $3.082 \times 10^{-4}$ |                       | 1226 | 29 | 12  |  |
| cellular response to chemical stimulus        | GO:0070887 | $4.252 \times 10^{-3}$ |                       | 3393 | 29 | 17  |  |
| extracellular matrix organization             | GO:0030198 | $5.062 \times 10^{-3}$ |                       | 401  | 29 | 7   |  |
| regulation of epithelial cell differentiation | GO:0030856 | $1.139 \times 10^{-2}$ |                       | 164  | 29 | 5   |  |
| regulation of cell death                      | GO:0010941 | $1.150 \times 10^{-2}$ |                       | 1720 | 29 | 12  |  |

1 to 5 of 5 << Page 1 of 1 >>

### 8505c\_DEL-22379 1 $\mu$ M. Gene enrichment analysis. Overexpressed genes

| GO:BP                            |            | stats                  |                       |     |    |     |  |
|----------------------------------|------------|------------------------|-----------------------|-----|----|-----|--|
| Term name                        | Term ID    | P <sub>adj</sub>       | $-\log_{10}(P_{adj})$ | T   | Q  | TnQ |  |
| cholesterol biosynthetic process | GO:0006695 | $6.813 \times 10^{-4}$ |                       | 74  | 16 | 4   |  |
| steroid biosynthetic process     | GO:0006694 | $8.460 \times 10^{-4}$ |                       | 196 | 16 | 5   |  |

1 to 2 of 2 << Page 1 of 1 >>

### 8505c\_DEL-22379 10 $\mu$ M. Gene enrichment analysis. Underexpressed genes

| GO:MF                          |            | stats                  |                       |     |     |     |  |
|--------------------------------|------------|------------------------|-----------------------|-----|-----|-----|--|
| Term name                      | Term ID    | P <sub>adj</sub>       | $-\log_{10}(P_{adj})$ | T   | Q   | TnQ |  |
| cytokine binding               | GO:0019955 | $9.532 \times 10^{-3}$ |                       | 138 | 113 | 7   |  |
| growth factor receptor binding | GO:0070851 | $1.199 \times 10^{-2}$ |                       | 143 | 113 | 7   |  |
| small GTPase binding           | GO:0031267 | $3.815 \times 10^{-2}$ |                       | 298 | 113 | 9   |  |

1 to 3 of 3 << Page 1 of 1 >>

| GO:BP                                                            |            | stats                  |                       |      |     |     |  |
|------------------------------------------------------------------|------------|------------------------|-----------------------|------|-----|-----|--|
| Term name                                                        | Term ID    | P <sub>adj</sub>       | $-\log_{10}(P_{adj})$ | T    | Q   | TnQ |  |
| angiogenesis                                                     | GO:0001525 | $1.097 \times 10^{-5}$ |                       | 617  | 111 | 19  |  |
| cellular response to chemical stimulus                           | GO:0070887 | $1.342 \times 10^{-4}$ |                       | 3393 | 111 | 45  |  |
| cell communication                                               | GO:0007154 | $6.898 \times 10^{-4}$ |                       | 6829 | 111 | 68  |  |
| chemotaxis                                                       | GO:0006935 | $8.228 \times 10^{-4}$ |                       | 653  | 111 | 17  |  |
| transmembrane receptor protein tyrosine kinase signaling pathway | GO:0007169 | $1.441 \times 10^{-3}$ |                       | 760  | 111 | 18  |  |
| signaling                                                        | GO:0023052 | $1.614 \times 10^{-3}$ |                       | 6810 | 111 | 67  |  |
| cell differentiation                                             | GO:0030154 | $4.364 \times 10^{-3}$ |                       | 4350 | 111 | 49  |  |
| cell adhesion                                                    | GO:0007155 | $1.718 \times 10^{-2}$ |                       | 1492 | 111 | 24  |  |
| MAPK cascade                                                     | GO:0000165 | $2.590 \times 10^{-2}$ |                       | 935  | 111 | 18  |  |
| positive regulation of inflammatory response                     | GO:0050729 | $4.818 \times 10^{-2}$ |                       | 142  | 111 | 7   |  |

1 to 10 of 10 << Page 1 of 1 >>

| GO:CC           |            | stats                  |                       |      |     |     |       |
|-----------------|------------|------------------------|-----------------------|------|-----|-----|-------|
| Term name       | Term ID    | P <sub>adj</sub>       | $-\log_{10}(P_{adj})$ | T    | Q   | TnQ | U     |
| plasma membrane | GO:0005886 | $9.283 \times 10^{-3}$ |                       | 5681 | 119 | 57  | 18960 |

1 to 1 of 1 << Page 1 of 1 >>

### 8505c\_DEL-22379 10 $\mu$ M. Gene enrichment analysis. Overexpressed genes

| GO:BP                                       |            | stats                  |                       |      |     |     |  |
|---------------------------------------------|------------|------------------------|-----------------------|------|-----|-----|--|
| Term name                                   | Term ID    | P <sub>adj</sub>       | $-\log_{10}(P_{adj})$ | T    | Q   | TnQ |  |
| cellular response to extracellular stimulus | GO:0031668 | $2.063 \times 10^{-2}$ |                       | 248  | 251 | 14  |  |
| lipid metabolic process                     | GO:0006629 | $4.873 \times 10^{-2}$ |                       | 1457 | 251 | 40  |  |

1 to 2 of 2 << Page 1 of 1 >>

| GO:CC           |            | stats                  |                       |      |     |     |  |
|-----------------|------------|------------------------|-----------------------|------|-----|-----|--|
| Term name       | Term ID    | P <sub>adj</sub>       | $-\log_{10}(P_{adj})$ | T    | Q   | TnQ |  |
| plasma membrane | GO:0005886 | $1.504 \times 10^{-2}$ |                       | 5681 | 272 | 112 |  |

1 to 1 of 1 << Page 1 of 1 >>

## F

### 8505c\_U0126. Gene enrichment analysis. Underexpressed genes

| GO:MF                      |            | stats                  |                       |      |     |     |  |
|----------------------------|------------|------------------------|-----------------------|------|-----|-----|--|
| Term name                  | Term ID    | Padj                   | $-\log_{10}(P_{adj})$ | T    | Q   | TnQ |  |
| signaling receptor binding | GO:0005102 | $4.076 \times 10^{-4}$ |                       | 1672 | 176 | 37  |  |
| cytokine binding           | GO:0019955 | $2.793 \times 10^{-2}$ |                       | 138  | 176 | 8   |  |

1 to 2 of 2 << Page 1 of 1 >>

| GO:BP                                                            |            | stats                  |                       |      |     |     |  |
|------------------------------------------------------------------|------------|------------------------|-----------------------|------|-----|-----|--|
| Term name                                                        | Term ID    | Padj                   | $-\log_{10}(P_{adj})$ | T    | Q   | TnQ |  |
| response to growth factor                                        | GO:0070848 | $3.693 \times 10^{-7}$ |                       | 759  | 174 | 29  |  |
| angiogenesis                                                     | GO:0001525 | $4.506 \times 10^{-7}$ |                       | 617  | 174 | 26  |  |
| cell communication                                               | GO:0007154 | $5.138 \times 10^{-6}$ |                       | 6829 | 174 | 104 |  |
| cell population proliferation                                    | GO:0008283 | $5.586 \times 10^{-6}$ |                       | 2054 | 174 | 48  |  |
| cellular response to chemical stimulus                           | GO:0070887 | $1.122 \times 10^{-5}$ |                       | 3393 | 174 | 65  |  |
| cell migration                                                   | GO:0016477 | $1.977 \times 10^{-5}$ |                       | 1649 | 174 | 41  |  |
| signaling                                                        | GO:0023052 | $2.613 \times 10^{-5}$ |                       | 6810 | 174 | 102 |  |
| epithelial cell differentiation                                  | GO:0030855 | $9.391 \times 10^{-5}$ |                       | 798  | 174 | 26  |  |
| regulation of kinase activity                                    | GO:0043549 | $1.159 \times 10^{-4}$ |                       | 921  | 174 | 28  |  |
| response to fibroblast growth factor                             | GO:0071774 | $5.362 \times 10^{-4}$ |                       | 153  | 174 | 11  |  |
| chemotaxis                                                       | GO:0006935 | $2.558 \times 10^{-3}$ |                       | 653  | 174 | 21  |  |
| regulation of MAP kinase activity                                | GO:0043405 | $4.620 \times 10^{-3}$ |                       | 316  | 174 | 14  |  |
| transmembrane receptor protein tyrosine kinase signaling pathway | GO:0007169 | $7.832 \times 10^{-3}$ |                       | 760  | 174 | 22  |  |
| mesenchyme development                                           | GO:0060485 | $9.816 \times 10^{-3}$ |                       | 291  | 174 | 13  |  |

1 to 14 of 14 << Page 1 of 1 >>

| GO:CC           |            | stats                  |                       |      |     |     |  |
|-----------------|------------|------------------------|-----------------------|------|-----|-----|--|
| Term name       | Term ID    | Padj                   | $-\log_{10}(P_{adj})$ | T    | Q   | TnQ |  |
| plasma membrane | GO:0005886 | $5.212 \times 10^{-4}$ |                       | 5681 | 180 | 84  |  |

1 to 1 of 1 << Page 1 of 1 >>

### 8505c\_U0126. Gene enrichment analysis. Overexpressed genes

| GO:MF                                       |            | stats                  |                       |     |     |     |  |
|---------------------------------------------|------------|------------------------|-----------------------|-----|-----|-----|--|
| Term name                                   | Term ID    | Padj                   | $-\log_{10}(P_{adj})$ | T   | Q   | TnQ |  |
| extracellular matrix structural constituent | GO:0005201 | $9.692 \times 10^{-3}$ |                       | 171 | 349 | 13  |  |

1 to 1 of 1 << Page 1 of 1 >>

| GO:BP                                           |            | stats                  |                       |      |     |     |  |
|-------------------------------------------------|------------|------------------------|-----------------------|------|-----|-----|--|
| Term name                                       | Term ID    | Padj                   | $-\log_{10}(P_{adj})$ | T    | Q   | TnQ |  |
| lipid metabolic process                         | GO:0006629 | $6.481 \times 10^{-4}$ |                       | 1457 | 327 | 54  |  |
| extracellular matrix organization               | GO:0030198 | $8.947 \times 10^{-3}$ |                       | 401  | 327 | 22  |  |
| regulation of intracellular signal transduction | GO:1902531 | $9.437 \times 10^{-3}$ |                       | 1842 | 327 | 60  |  |

1 to 3 of 3 << Page 1 of 1 >>

| GO:CC                |            | stats                  |                       |       |     |     |  |
|----------------------|------------|------------------------|-----------------------|-------|-----|-----|--|
| Term name            | Term ID    | Padj                   | $-\log_{10}(P_{adj})$ | T     | Q   | TnQ |  |
| extracellular matrix | GO:0031012 | $1.612 \times 10^{-4}$ |                       | 562   | 346 | 29  |  |
| cytoplasm            | GO:0005737 | $3.524 \times 10^{-2}$ |                       | 11911 | 346 | 250 |  |

1 to 2 of 2 << Page 1 of 1 >>

## G

### CAL62\_DEL-22379 10 $\mu$ M. Gene enrichment analysis. Underexpressed genes

| GO:MF                                       |            | stats                  |                       |     |     |     |  |
|---------------------------------------------|------------|------------------------|-----------------------|-----|-----|-----|--|
| Term name                                   | Term ID    | P <sub>adj</sub>       | $-\log_{10}(P_{adj})$ | T   | Q   | TnQ |  |
| calcium ion binding                         | GO:0005509 | $1.667 \times 10^{-8}$ |                       | 721 | 458 | 46  |  |
| extracellular matrix structural constituent | GO:0005201 | $4.345 \times 10^{-2}$ |                       | 171 | 458 | 14  |  |

1 to 2 of 2 | Page 1 of 1

| GO:BP                                       |            | stats                  |                       |      |     |     |  |
|---------------------------------------------|------------|------------------------|-----------------------|------|-----|-----|--|
| Term name                                   | Term ID    | P <sub>adj</sub>       | $-\log_{10}(P_{adj})$ | T    | Q   | TnQ |  |
| cell adhesion                               | GO:0007155 | $2.582 \times 10^{-9}$ |                       | 1492 | 437 | 82  |  |
| cell junction organization                  | GO:0034330 | $2.333 \times 10^{-3}$ |                       | 722  | 437 | 40  |  |
| stem cell development                       | GO:0048864 | $1.352 \times 10^{-2}$ |                       | 84   | 437 | 11  |  |
| mesenchymal cell development                | GO:0014031 | $1.352 \times 10^{-2}$ |                       | 84   | 437 | 11  |  |
| response to transforming growth factor beta | GO:0071559 | $1.534 \times 10^{-2}$ |                       | 262  | 437 | 20  |  |
| extracellular matrix organization           | GO:0030198 | $3.931 \times 10^{-2}$ |                       | 401  | 437 | 25  |  |

1 to 6 of 6 | Page 1 of 1

| GO:CC                       |            | stats                  |                       |      |     |     |  |
|-----------------------------|------------|------------------------|-----------------------|------|-----|-----|--|
| Term name                   | Term ID    | P <sub>adj</sub>       | $-\log_{10}(P_{adj})$ | T    | Q   | TnQ |  |
| extracellular matrix        | GO:0031012 | $3.657 \times 10^{-4}$ |                       | 562  | 459 | 34  |  |
| endoplasmic reticulum lumen | GO:0005788 | $6.627 \times 10^{-4}$ |                       | 307  | 459 | 23  |  |
| plasma membrane             | GO:0005886 | $2.673 \times 10^{-3}$ |                       | 5681 | 459 | 181 |  |

1 to 3 of 3 | Page 1 of 1

### CAL62\_DEL-22379 10 $\mu$ M. Gene enrichment analysis. Overexpressed genes

| GO:MF                                        |            | stats                  |                       |      |     |     |  |
|----------------------------------------------|------------|------------------------|-----------------------|------|-----|-----|--|
| Term name                                    | Term ID    | P <sub>adj</sub>       | $-\log_{10}(P_{adj})$ | T    | Q   | TnQ |  |
| DNA-binding transcription activator activity | GO:0001216 | $3.760 \times 10^{-4}$ |                       | 455  | 627 | 37  |  |
| signaling receptor binding                   | GO:0005102 | $4.094 \times 10^{-4}$ |                       | 1672 | 627 | 93  |  |
| protein kinase binding                       | GO:0019901 | $2.303 \times 10^{-2}$ |                       | 673  | 627 | 43  |  |
| mitogen-activated protein kinase binding     | GO:0051019 | $4.002 \times 10^{-2}$ |                       | 32   | 627 | 7   |  |

1 to 4 of 4 | Page 1 of 1

| GO:BP                                                     |            | stats                   |                       |      |     |     |  |
|-----------------------------------------------------------|------------|-------------------------|-----------------------|------|-----|-----|--|
| Term name                                                 | Term ID    | P <sub>adj</sub>        | $-\log_{10}(P_{adj})$ | T    | Q   | TnQ |  |
| cell differentiation                                      | GO:0030154 | $5.087 \times 10^{-16}$ |                       | 4350 | 604 | 243 |  |
| cellular response to chemical stimulus                    | GO:0070887 | $1.630 \times 10^{-10}$ |                       | 3393 | 604 | 188 |  |
| cell population proliferation                             | GO:0008283 | $1.025 \times 10^{-6}$  |                       | 2054 | 604 | 120 |  |
| cell communication                                        | GO:0007154 | $5.139 \times 10^{-6}$  |                       | 6829 | 604 | 298 |  |
| signaling                                                 | GO:0023052 | $1.639 \times 10^{-5}$  |                       | 6810 | 604 | 295 |  |
| response to cytokine                                      | GO:0034097 | $2.782 \times 10^{-5}$  |                       | 1226 | 604 | 79  |  |
| positive regulation of transcription by RNA polymerase II | GO:0045944 | $1.016 \times 10^{-4}$  |                       | 1197 | 604 | 76  |  |
| cell adhesion                                             | GO:0007155 | $4.490 \times 10^{-4}$  |                       | 1492 | 604 | 87  |  |
| regulation of transport                                   | GO:0051049 | $1.149 \times 10^{-3}$  |                       | 1809 | 604 | 99  |  |
| protein kinase B signaling                                | GO:0043491 | $3.064 \times 10^{-3}$  |                       | 286  | 604 | 27  |  |

1 to 10 of 10 | Page 1 of 1

| GO:CC                |            | stats                  |                       |      |     |     |  |
|----------------------|------------|------------------------|-----------------------|------|-----|-----|--|
| Term name            | Term ID    | P <sub>adj</sub>       | $-\log_{10}(P_{adj})$ | T    | Q   | TnQ |  |
| extracellular region | GO:0005576 | $2.091 \times 10^{-3}$ |                       | 4567 | 638 | 202 |  |
| cell periphery       | GO:0071944 | $2.480 \times 10^{-2}$ |                       | 6169 | 638 | 253 |  |

1 to 2 of 2 | Page 1 of 1

**G**

**CAL62\_U0126. Gene enrichment analysis. Underexpressed genes**

| GO:MF                          |            | stats                   |                       |      |     |     |
|--------------------------------|------------|-------------------------|-----------------------|------|-----|-----|
| Term name                      | Term ID    | P <sub>adj</sub>        | $-\log_{10}(P_{adj})$ | T    | Q   | TnQ |
| DNA helicase activity          | GO:0003678 | $2.120 \times 10^{-16}$ |                       | 76   | 527 | 24  |
| ATPase activity                | GO:0016887 | $1.767 \times 10^{-14}$ |                       | 488  | 527 | 53  |
| DNA replication origin binding | GO:0003688 | $1.304 \times 10^{-10}$ |                       | 23   | 527 | 12  |
| microtubule binding            | GO:0008017 | $4.548 \times 10^{-9}$  |                       | 271  | 527 | 32  |
| DNA binding                    | GO:0003677 | $1.460 \times 10^{-6}$  |                       | 2486 | 527 | 119 |
| damaged DNA binding            | GO:0003684 | $1.220 \times 10^{-3}$  |                       | 66   | 527 | 11  |
| cytoskeletal protein binding   | GO:0008092 | $1.851 \times 10^{-3}$  |                       | 996  | 527 | 54  |
| kinase binding                 | GO:0019900 | $1.206 \times 10^{-2}$  |                       | 752  | 527 | 42  |

1 to 8 of 8 << Page 1 of 1 >>

| GO:BP                                    |            | stats                   |                       |      |     |     |
|------------------------------------------|------------|-------------------------|-----------------------|------|-----|-----|
| Term name                                | Term ID    | P <sub>adj</sub>        | $-\log_{10}(P_{adj})$ | T    | Q   | TnQ |
| cell cycle                               | GO:0007049 | $8.800 \times 10^{-71}$ |                       | 1902 | 521 | 211 |
| chromosome segregation                   | GO:0007059 | $7.300 \times 10^{-51}$ |                       | 334  | 521 | 83  |
| organelle fission                        | GO:0048285 | $7.402 \times 10^{-51}$ |                       | 497  | 521 | 98  |
| DNA replication                          | GO:0006260 | $1.992 \times 10^{-47}$ |                       | 286  | 521 | 75  |
| cellular response to DNA damage stimulus | GO:0006974 | $4.570 \times 10^{-31}$ |                       | 888  | 521 | 102 |
| DNA repair                               | GO:0006281 | $4.746 \times 10^{-30}$ |                       | 576  | 521 | 81  |
| microtubule cytoskeleton organization    | GO:0000226 | $5.101 \times 10^{-16}$ |                       | 613  | 521 | 64  |

1 to 7 of 7 << Page 1 of 1 >>

| GO:CC        |            | stats                   |                       |       |     |     |
|--------------|------------|-------------------------|-----------------------|-------|-----|-----|
| Term name    | Term ID    | P <sub>adj</sub>        | $-\log_{10}(P_{adj})$ | T     | Q   | TnQ |
| chromosome   | GO:0005694 | $4.149 \times 10^{-37}$ |                       | 2071  | 539 | 170 |
| nucleus      | GO:0005634 | $6.288 \times 10^{-16}$ |                       | 7592  | 539 | 315 |
| cytoskeleton | GO:0005856 | $2.040 \times 10^{-6}$  |                       | 2332  | 539 | 113 |
| organelle    | GO:0043226 | $4.898 \times 10^{-4}$  |                       | 14008 | 539 | 444 |

1 to 4 of 4 << Page 1 of 1 >>

**CAL62\_U0126. Gene enrichment analysis. Overexpressed genes**

| GO:MF                                  |            | stats                  |                       |     |     |     |
|----------------------------------------|------------|------------------------|-----------------------|-----|-----|-----|
| Term name                              | Term ID    | P <sub>adj</sub>       | $-\log_{10}(P_{adj})$ | T   | Q   | TnQ |
| calcium ion binding                    | GO:0005509 | $1.316 \times 10^{-7}$ |                       | 721 | 425 | 46  |
| extracellular matrix binding           | GO:0050840 | $2.129 \times 10^{-4}$ |                       | 56  | 425 | 10  |
| platelet-derived growth factor binding | GO:0048407 | $3.494 \times 10^{-2}$ |                       | 11  | 425 | 4   |

1 to 3 of 3 << Page 1 of 1 >>

| GO:BP                             |            | stats                   |                       |      |     |     |
|-----------------------------------|------------|-------------------------|-----------------------|------|-----|-----|
| Term name                         | Term ID    | P <sub>adj</sub>        | $-\log_{10}(P_{adj})$ | T    | Q   | TnQ |
| extracellular matrix organization | GO:0030198 | $6.808 \times 10^{-12}$ |                       | 401  | 408 | 40  |
| cell adhesion                     | GO:0007155 | $6.819 \times 10^{-6}$  |                       | 1492 | 408 | 75  |
| cell junction organization        | GO:0034330 | $4.772 \times 10^{-5}$  |                       | 722  | 408 | 42  |
| cell differentiation              | GO:0030154 | $6.339 \times 10^{-5}$  |                       | 4350 | 408 | 147 |
| blood vessel development          | GO:0001568 | $4.139 \times 10^{-3}$  |                       | 792  | 408 | 40  |
| cell migration                    | GO:0016477 | $7.193 \times 10^{-3}$  |                       | 1649 | 408 | 66  |
| vasculature development           | GO:0001944 | $1.292 \times 10^{-2}$  |                       | 830  | 408 | 40  |
| regulation of signal transduction | GO:0009966 | $2.166 \times 10^{-2}$  |                       | 3165 | 408 | 106 |
| cytoskeleton organization         | GO:0007010 | $3.690 \times 10^{-2}$  |                       | 1423 | 408 | 57  |

1 to 9 of 9 << Page 1 of 1 >>

| GO:CC                       |            | stats                   |                       |      |     |     |
|-----------------------------|------------|-------------------------|-----------------------|------|-----|-----|
| Term name                   | Term ID    | P <sub>adj</sub>        | $-\log_{10}(P_{adj})$ | T    | Q   | TnQ |
| extracellular matrix        | GO:0031012 | $1.478 \times 10^{-13}$ |                       | 562  | 428 | 49  |
| endoplasmic reticulum lumen | GO:0005788 | $1.146 \times 10^{-5}$  |                       | 307  | 428 | 25  |
| cell junction               | GO:0030054 | $1.172 \times 10^{-3}$  |                       | 2105 | 428 | 79  |
| stress fiber                | GO:0001725 | $4.606 \times 10^{-2}$  |                       | 68   | 428 | 8   |

1 to 4 of 4 << Page 1 of 1 >>
